# Supplementary material for: Identifying patients with psychosocial problems in general practice: a scoping review protocol
Source: HighWire-hosted journal article supplement (doi:10.1136/bmjopen-2021-051383), 2021-12-01
Supplement: bmjopen-2021-051383supp001_data_supplement.pdf [file bmjopen-2021-051383supp001_data_supplement.pdf]

|    |                                                                                                                                                                                                                                                                                                                                                                                                                                                                                   |
|----|-----------------------------------------------------------------------------------------------------------------------------------------------------------------------------------------------------------------------------------------------------------------------------------------------------------------------------------------------------------------------------------------------------------------------------------------------------------------------------------|
| 1  | ((psychosocial or social or mental or psychological or emotional) adj3 (problem* or strain* or stress* or distress* or burden* or issue* or pressure* or suffer* or struggle* or difficult*)).ti,ab.                                                                                                                                                                                                                                                                              |
| 2  | ((poverty or financial or food or water or housing or neighbo*rhood or work or unemployment or education or legal) adj problem*).ti,ab.                                                                                                                                                                                                                                                                                                                                           |
| 3  | ((social adj cultural) or (social adj welfare) or (health adj care adj system) or (compliance) or (being adj ill) or (partner* adj behavio*r) or (partner* adj illness*) or ((loss or death) adj3 partner*) or ((loss or death) adj3 child*) or ((assault or harmful) adj event)) adj (problem*).ti,ab.                                                                                                                                                                           |
| 4  | ((relationship* adj problem* adj2 partner*) or (relationship* adj problem* adj2 child*) or (illness adj problem* adj2 child*) or (relationship* adj problem* adj (parent* or family)) or (behavio* adj problem* adj (parent* or family)) or (illness adj problem* adj (parent* or family)) or ((loss or death) adj (parent* or family) adj member*) or (relationship* adj problem* adj friend*) or (fear adj2 social adj problem*) or (limited adj (function or disability))).ti. |
| 5  | exp life change events/                                                                                                                                                                                                                                                                                                                                                                                                                                                           |
| 6  | (complex adj3 health adj3 social).ti,ab.                                                                                                                                                                                                                                                                                                                                                                                                                                          |
| 7  | exp psychosocial deprivation/                                                                                                                                                                                                                                                                                                                                                                                                                                                     |
| 8  | or/1-7                                                                                                                                                                                                                                                                                                                                                                                                                                                                            |
| 9  | exp patient health questionnaire/                                                                                                                                                                                                                                                                                                                                                                                                                                                 |
| 10 | (identifi* or detect* or screen* or recogni* or discover*).ti.                                                                                                                                                                                                                                                                                                                                                                                                                    |
| 11 | ((tool* or instrument* or questionnaire* or interview*) or (medical adj interview*) or (history adj taking)).ti,ab.                                                                                                                                                                                                                                                                                                                                                               |
| 12 | exp mass screening/                                                                                                                                                                                                                                                                                                                                                                                                                                                               |
| 13 | biopsychosocial*.ti,ab.                                                                                                                                                                                                                                                                                                                                                                                                                                                           |
| 14 | or/9-13                                                                                                                                                                                                                                                                                                                                                                                                                                                                           |
| 15 | exp family practice/                                                                                                                                                                                                                                                                                                                                                                                                                                                              |
| 16 | Physicians, Family/                                                                                                                                                                                                                                                                                                                                                                                                                                                               |
| 17 | exp general practice/                                                                                                                                                                                                                                                                                                                                                                                                                                                             |
| 18 | exp family health/                                                                                                                                                                                                                                                                                                                                                                                                                                                                |
| 19 | ((general or family) adj (practi* or physician* or doctor* or clinician* or medicine*)) or (nurse* adj practition*).ti,ab.                                                                                                                                                                                                                                                                                                                                                        |
| 20 | or/14-19                                                                                                                                                                                                                                                                                                                                                                                                                                                                          |
| 21 | 8 and 14 and 20                                                                                                                                                                                                                                                                                                                                                                                                                                                                   |

Table 1: Search strategy in MEDLINE (Ovid)
